# Supplementary material for: Long-term erosion of the Nepal Himalayas by bedrock landsliding: the role of monsoons, earthquakes and giant landslides
Source: Copernicus journal article supplement (doi:10.5194/esurf-7-107-2019), 2019-01-25
Supplement: Supplementary file [file esurf-7-107-2019-supplement-title-page.pdf › esurf-7-107-2019-supplement-title-page.pdf]

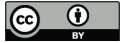

## *Supplement of*

# **Long-term erosion of the Nepal Himalayas by bedrock landsliding: the role of monsoons, earthquakes and giant landslides**

**Odin Marc et al.**

*Correspondence to:* Odin Marc ([odin.marc@unistra.fr](mailto:odin.marc@unistra.fr))

- [esurf-7-107-2019-supplement-title-page.pdf](#)
- BG\_ldsl\_MSN10.txt
- BG\_ldsl\_MSN11.txt
- BG\_ldsl\_MSN12.txt
- BG\_ldsl\_MSN13.txt
- BG\_ldsl\_MSN14.txt
- BG\_ldsl\_MSN15.txt
- BG\_ldsl\_MSN16.txt
- BG\_ldsl\_MSN17.txt
- BK\_Ldsl\_AFT15.txt
- BK\_Ldsl\_GLOF16.txt
- BK\_Ldsl\_MSN10.txt
- BK\_Ldsl\_MSN11.txt
- BK\_Ldsl\_MSN12.txt
- BK\_Ldsl\_MSN13.txt
- BK\_Ldsl\_MSN14.txt
- BK\_Ldsl\_MSN15.txt
- BK\_Ldsl\_MSN16.txt
- BK\_Ldsl\_MSN17.txt
- GiantLdsl\_Nepal.txt

- KG\_ldsl\_MSN10.txt
- KG\_ldsl\_MSN11.txt
- KG\_ldsl\_MSN12.txt
- KG\_ldsl\_MSN13.txt
- KG\_ldsl\_MSN14.txt
- KG\_ldsl\_MSN15.txt
- KG\_ldsl\_MSN16.txt
- KG\_ldsl\_MSN17.txt
- README.txt
- T\_MSN\_2010.txt
- T\_MSN\_2011.txt
- T\_MSN\_2012.txt
- T\_MSN\_2013.txt
- T\_MSN\_2014.txt
- T\_MSN\_2015.txt
- T\_MSN\_2016.txt
- T\_MSN\_2017.txt
- esurf-2018-69-supplement.pdf

The copyright of individual parts of the supplement might differ from the CC BY 4.0 License.
